# Supplementary material for: Distinct involvement of the cranial and spinal nerves in progressive supranuclear palsy
Source: PubMed Central journal article supplement (PMC10994524; doi:10.1093/brain/awad381), 2023-11-16
Supplement: awad381_supplementary_data.pdf [file awad381_supplementary_data.pdf]

**Supplementary Materials for:**

**Distinct involvement of the cranial and spinal nerves in progressive supranuclear palsy**

Hidetomo Tanaka, Ivan Martinez-Valbuena, Shelley L. Forrest, Blas Couto, Nikolai Gil Reyes, Alonso Morales-Rivero, Seojin Lee, Jun Li, Ali M. Karakani, David F. Tang-Wai, Charles Tator, Mozhgan Khadadadi, Nusrat Sadia, Maria Carmela Tartaglia, Anthony E. Lang, and Gabor G. Kovacs

The supplementary materials contain five s-Tables and four s-Figures.

**Supplementary Table 1. Summary of the co-pathology of the studied cases**

|                                | <b>PSP (n = 15)</b> | <b>AD (n = 18)</b> | <b>CTE (n = 5)</b> | <b>CBD (n = 6)</b> |
|--------------------------------|---------------------|--------------------|--------------------|--------------------|
| AD-NC score*, mean ( $\pm$ SD) | 0.53 ( $\pm$ 0.74)  | 3.00 ( $\pm$ 0.00) | 0.80 ( $\pm$ 1.30) | 0.80 ( $\pm$ 0.84) |
| AGD positive, n (%)            | 6 (40.0)            | 0 (0.0)            | 3 (60.0)           | 2 (33.3)           |
| LBD positive, n (%)            | 4 (26.7)            | 13 (72.2)          | 2 (40.0)           | 2 (33.3)           |
| LATE-NC positive, n (%)        | 1 (6.7)             | 5 (27.8)           | 2 (40.0)           | 1 (16.7)           |

AGD = argyrophilic grain disease; LBD = Lewy body disease; LATE-NC = limbic predominant age-related TDP-43 encephalopathy neuropathological change; SD = standard deviation. \*AD-NC score: the level of AD neuropathologic change<sup>15</sup> was scored as follows, Not = 0; Low = 1; Intermediate = 2; High = 3.

**Supplementary Table 2. Summary of tau pathology in the PNS in Pick's disease**

| # of cases            | <b>Pick's disease</b> |            |          |
|-----------------------|-----------------------|------------|----------|
|                       | (n = 9)               |            |          |
|                       | <b>Available</b>      | <b>Tau</b> | <b>%</b> |
| <b>Cranial nerves</b> |                       |            |          |
| <b>III</b>            | 3                     | 0          | <b>0</b> |
| <b>V</b>              | 1                     | 0          | <b>0</b> |
| <b>IX/X</b>           | 2                     | 0          | <b>0</b> |
| <b>XII</b>            | 4                     | 0          | <b>0</b> |
| <b>Spinal roots</b>   |                       |            |          |
| <b>Ant.</b>           | 1                     | 0          | <b>0</b> |
| <b>Post.</b>          | 1                     | 0          | <b>0</b> |
| <b>Total case #</b>   | <b>5</b>              | <b>0</b>   | <b>0</b> |

Available = number of available cases; Tau = number of tau-positive cases; Ant. = anterior spinal roots; Post. = posterior spinal roots.

**Supplementary Table 3.** Summary of staining profiles of the PNS-tau in PSP cases

| <b>Staining profile of PNS-tau</b> |               |            |              |                |               |                |            |
|------------------------------------|---------------|------------|--------------|----------------|---------------|----------------|------------|
| <b>4R-tau</b>                      | <b>3R-tau</b> | <b>AT8</b> | <b>AT180</b> | <b>pThr217</b> | <b>Alz-50</b> | <b>Gallyas</b> | <b>p62</b> |
| ++                                 | -             | ++         | ++           | ++             | +             | + ~ ++         | +          |

They are evaluated using the following criteria. -, negative; +, positive; ++, positive (abundant).

**Supplementary Table 4. Summary of p-TDP-43 pathology in the PNS in PSP**

| # of cases            | PSP (n = 15) |        |   |
|-----------------------|--------------|--------|---|
|                       | Available    | TDP-43 | % |
| <b>Cranial nerves</b> |              |        |   |
| III                   | 3            | 0      | 0 |
| V                     | 1            | 0      | 0 |
| IX/X                  | 2            | 0      | 0 |
| XII                   | 4            | 0      | 0 |
| <b>Spinal roots</b>   |              |        |   |
| Ant.                  | 1            | 0      | 0 |
| Post.                 | 1            | 0      | 0 |
| <b>Total case #</b>   | 5            | 0      | 0 |

PSP = progressive supranuclear palsy; Available = number of available cases; TDP-43 = number of p-TDP-43-positive cases; Ant. = anterior spinal roots; Post. = posterior spinal roots.

**Supplementary Table 5. Clinical features of all studied PSP cases**

| Case No.                                          | 1               | 2     | 3   | 4   | 5                                               | 6      | 7        | 8   | 9      | 10     | 11                              | 12  | 13     | 14  | 15  |                                   |
|---------------------------------------------------|-----------------|-------|-----|-----|-------------------------------------------------|--------|----------|-----|--------|--------|---------------------------------|-----|--------|-----|-----|-----------------------------------|
| Sex                                               | F               | F     | F   | M   | M                                               | M      | M        | M   | M      | M      | M                               | F   | M      | F   | M   | M:F = 10 : 5                      |
| Age at death                                      | 69              | 63    | 90  | 73  | 76                                              | 73     | 71       | 93  | 77     | 72     | 72                              | 73  | 79     | 68  | 72  | 74.7 ± 7.8                        |
| Duration of illness, years                        | 8               | 3     | 23  | 8   | 5                                               | 3      | 5        | 8   | 8      | 11     | 11                              | 7   | 5      | 4   | 11  | 8.0 ± 5.0                         |
| Clinical diagnosis                                | PSP             | PSP-F | PDD | CTE | PSP-RS                                          | PSP-RS | PSP-RS   | CBS | PSP-RS | PSP-RS | PSP                             | CBS | PSP-RS | PSP | PSP |                                   |
| Symptoms                                          |                 |       |     |     |                                                 |        |          |     |        |        |                                 |     |        |     |     | # of positive/available cases (%) |
| Eye movement disorder                             | +               | +     | -   | +   | +                                               | +      | +        | -   | +      | +      | +                               | +   | +      | +   | +   | 13/15 (87%)                       |
| - Supranuclear palsy<br>(Oculocephalic maneuver*) | +               | +     | na  | +   | +                                               | +      | na       | na  | +      | na     | +                               | +   | +      | +   | +   | 11/11 (100)                       |
| Bulbar palsy                                      | +               | +     | +   | na  | +                                               | +      | +        | +   | +      | +      | +                               | +   | +      | +   | +   | 14/14 (100)                       |
| -Dysphagia                                        | +               | +     | +   | na  | +                                               | +      | +        | +   | +      | +      | +                               | -   | +      | -   | +   | 12/14 (86)                        |
| -Dysarthria                                       | +               | na    | +   | na  | +                                               | +      | +        | na  | +      | +      | +                               | +   | +      | +   | +   | 12/12 (100)                       |
| Sensory disturbance<br>in the extremities         | -               | -     | +   | +   | -                                               | +      | -        | -   | -      | -      | +                               | -   | -      | -   | +   | 5/15 (33)                         |
| Motor paralysis<br>in the extremities             | -               | +     | -   | +   | -                                               | -      | na       | +   | -      | -      | -                               | +   | -      | +   | -   | 5/14 (36)                         |
| Lower-motor neuron signs                          | -               | na    | na  | +   | +                                               | +      | na       | na  | +      | -      | +                               | na  | -      | na  | +   | 6/9 (67)                          |
| Other features                                    | Urinary urgency |       |     |     | Urinary frequency; diplopia, eyelid dysfunction |        | Diplopia |     |        |        | Urge incontinence, diplopia, DM |     |        |     |     |                                   |

M = male; F = female; CBS = corticobasal syndrome; PDD = Parkinson's disease with dementia; PSP-RS = PSP-Richardson's syndrome; PSP-F = PSP-frontal variant; na = not available.

\*Documented well before death; the patients' supranuclear palsy may have evolved to a nuclear palsy late in the course,<sup>31</sup> but this was not documented in the records.

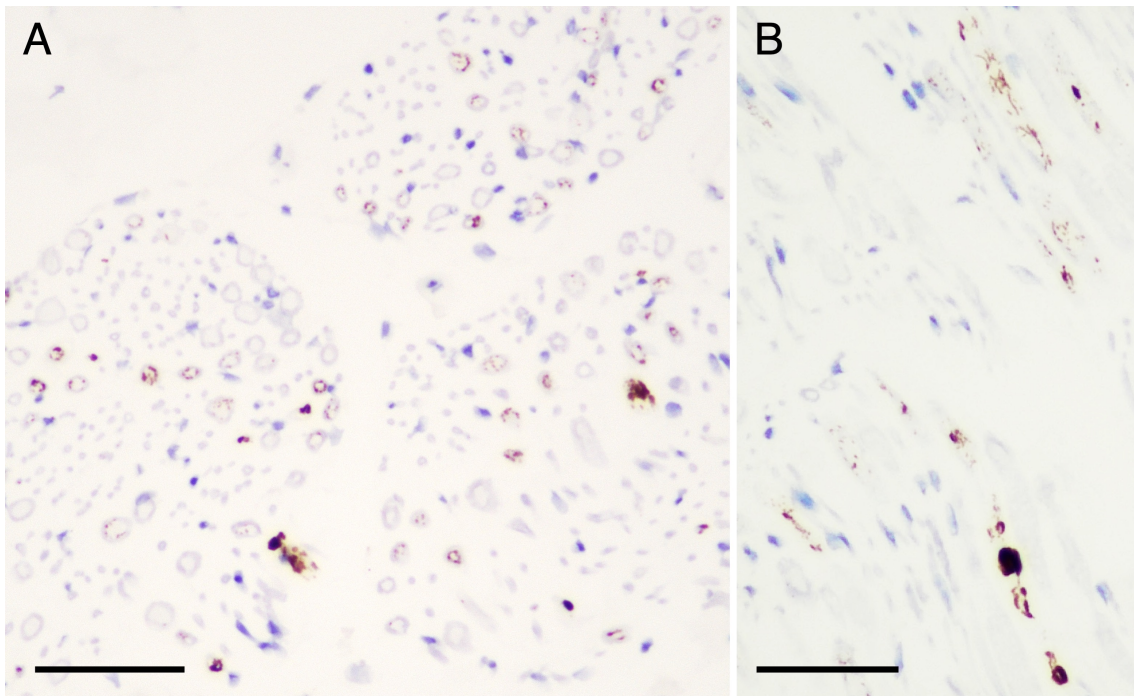

**Supplementary Figure 1. PNS tau lesions in the further case with limbic-predominant neuronal inclusion body 4-repeat tauopathy (LNT)/PSP-type pathology.**

(**A, B**) p-tau pathology (AT8) in the spinal anterior roots, cross sections (**A**) and sagittal sections (**B**). Scale bars: (**A** and **B**) 50  $\mu$ m.

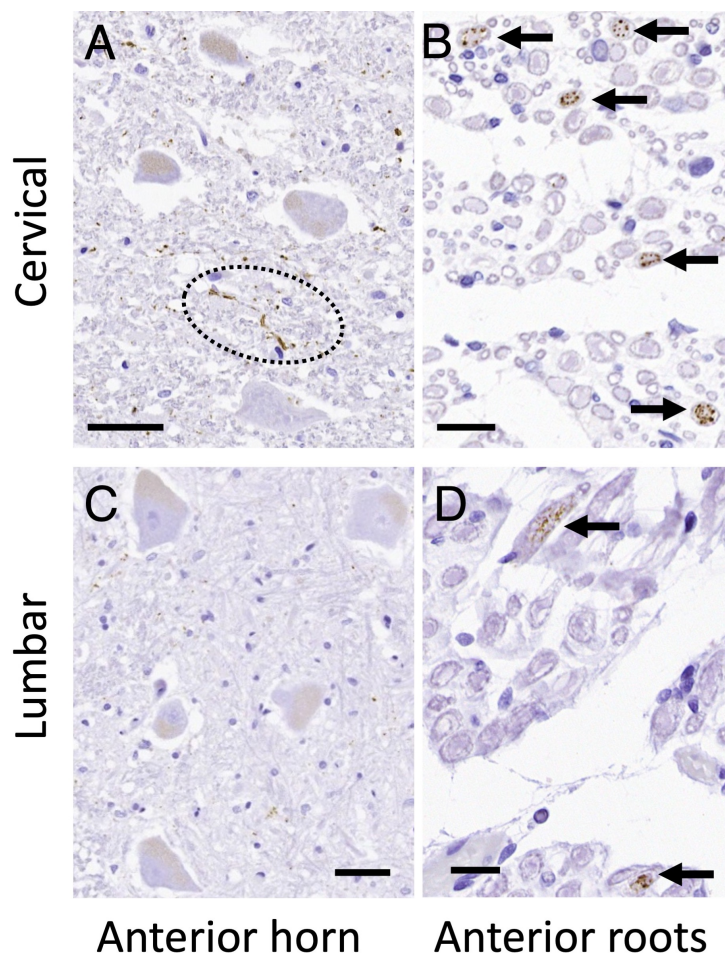

**Supplementary Figure 2. Tau accumulation in the anterior spinal root without neuronal cytoplasmic inclusions in the corresponding anterior horn.**

(A-D) While there are only few threads (A: cervical cord, circle) and no obvious tau-positive inclusions (C: lumbar cord), tau aggregates are shown in the anterior spinal roots (B: cervical and D: lumbar; arrows: tau aggregates). (A-D) PSP case 8. (A-D) AT8. Scale bars: (A and C) 50  $\mu\text{m}$ , (B and D) 20  $\mu\text{m}$ .



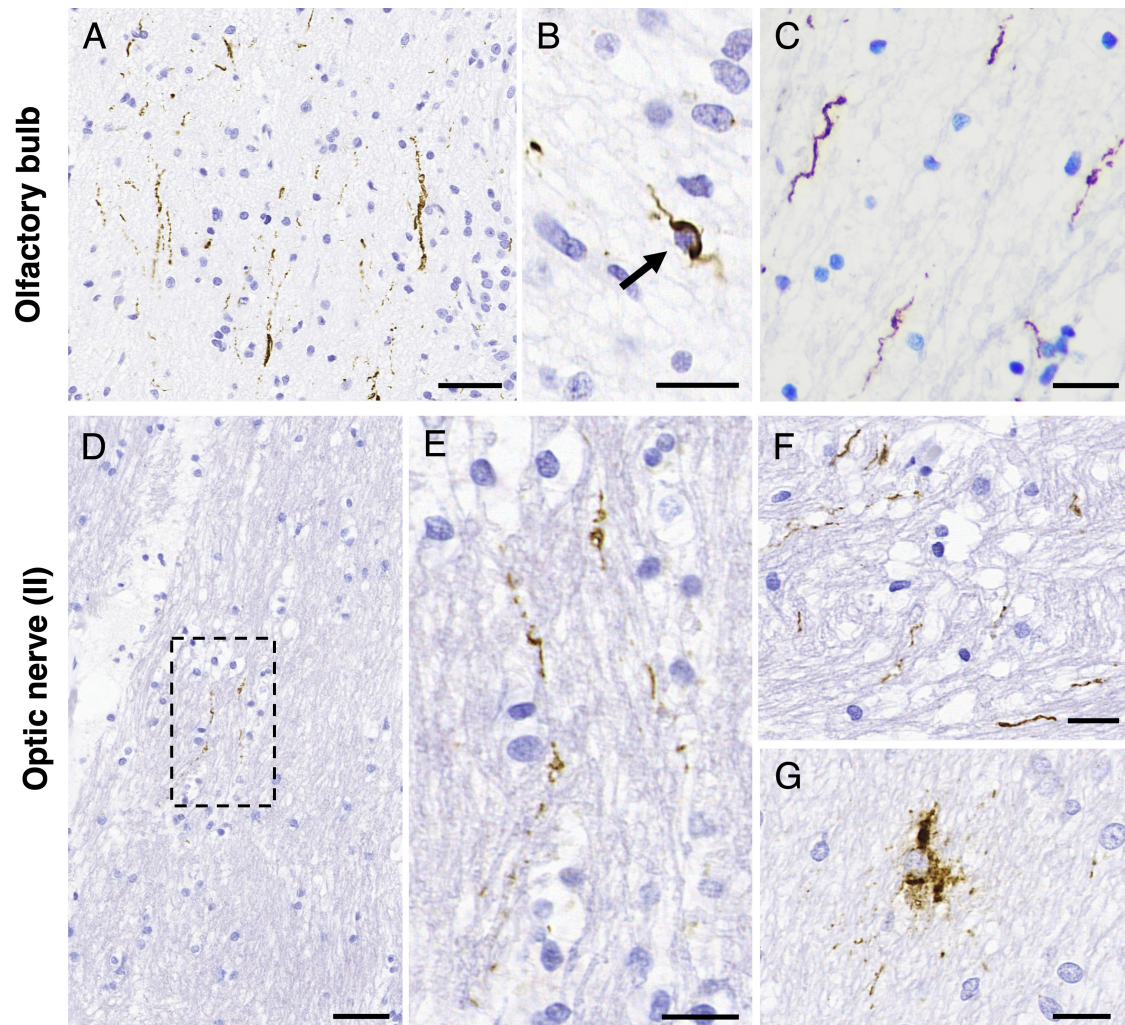

**Supplementary Figure 3. p-tau (AT8)-positive inclusions in the olfactory bulb and optic nerves in PSP cases.**

(A-C) p-tau-positive inclusions in the olfactory bulb, including threads, neurites (A and C), and oligodendroglial coiled body-like inclusions (B, arrow). (D-G) p-tau-positive inclusions in the optic nerve (D), including threads, neurites (E: high magnification image of clear square in D; and F), and tau-positive cytoplasmic inclusions resembling tau-positive astrocytes (G). (A, B, and G) PSP case 6, (C and F) PSP case 11, (D and E) PSP case 5. Scale bars: (A and D) 50  $\mu\text{m}$ , (B, C, E, F, and G) 20  $\mu\text{m}$ .



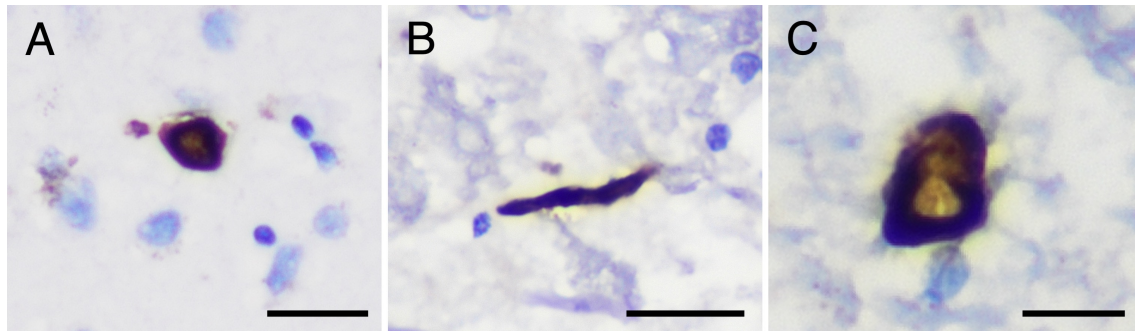

**Supplementary Figure 4. pTDP-43-positive inclusions in the CNS, motor cortex and spinal cord, in the PSP cases.**

(A-C) pTDP-43-positive inclusion in a neuron (A), neurite (B), and glial cell (C) in the motor cortex (A) and spinal cord white matter (B and C). Scale bars: (A and B) 20  $\mu\text{m}$ , (C) 10  $\mu\text{m}$ .
